# Supplementary material
Source: Springer Nature journal article supplement (https://www.springermedizin.de/resource/supplementary/12895_2013_162_MOESM4_ESM.pdf/9514276)

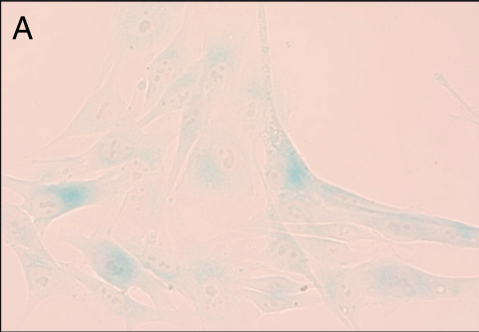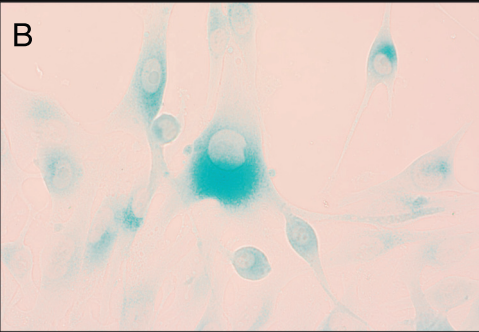

**C**

miRVec-125b miRVec-control

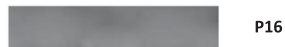

Blank

blank

**P16**

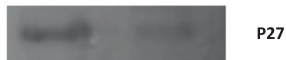

4,69

1,00

**P27**

fold change

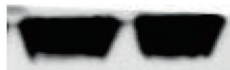

**Actin**

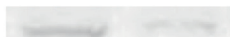

2,03

1,00

**P53**

fold change

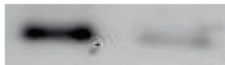

4,64

1,00

**P21**

fold change

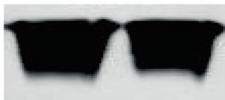

**Actin**

Supplement: MOESM4 [file 9514276]
